# Supplementary material for: Evidence for cooperative tandem binding of hnRNP C RRMs in mRNA processing
Source: PubMed Central journal article supplement — RNA. 2015 Nov;21(11):1931–42. doi: 10.1261/rna.052373.115 (PMC4604433; doi:10.1261/rna.052373.115), 2015-11
Supplement: supp_052373.115_SuppRFig2.pdf [file supp_052373.115_SuppRFig2.pdf]

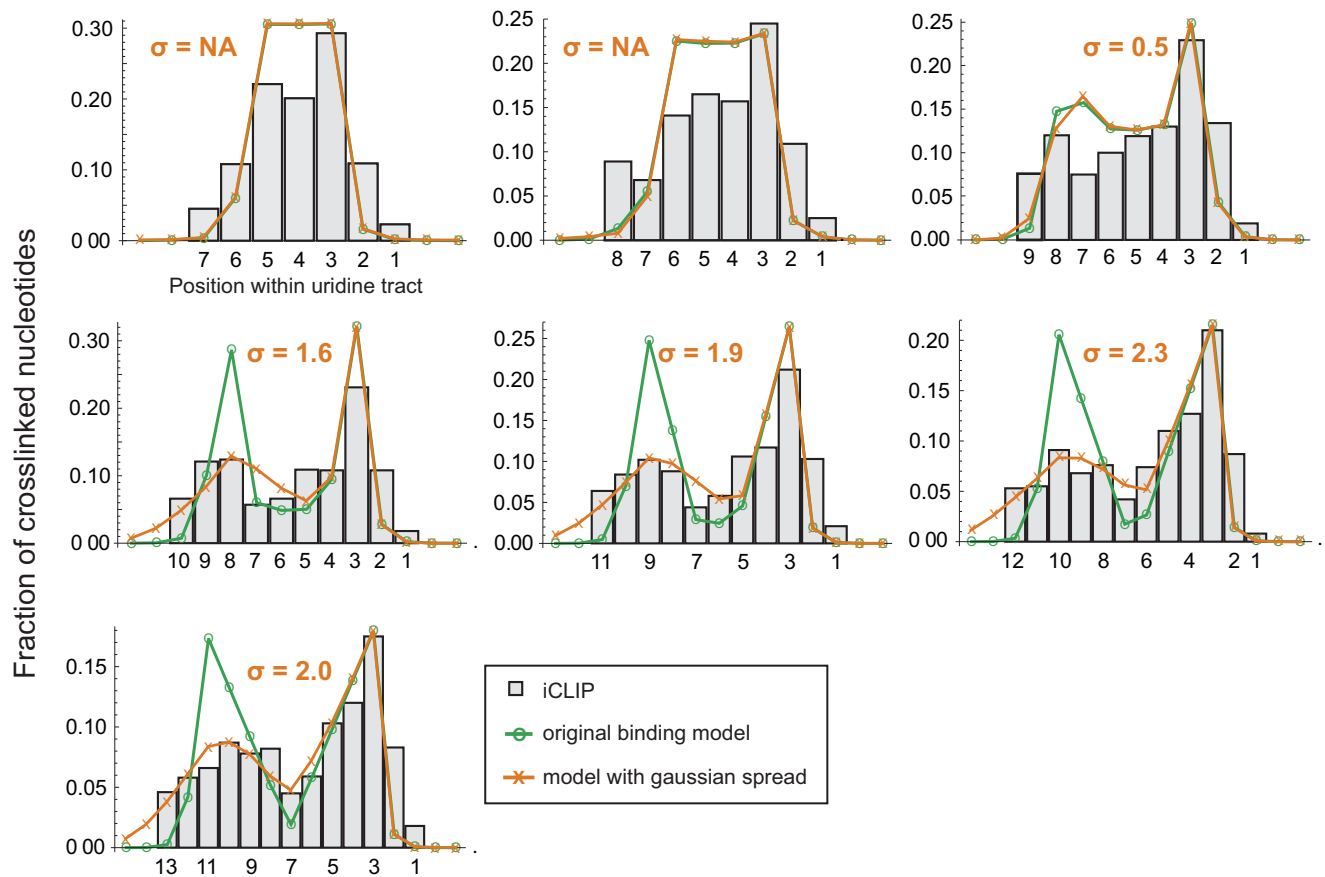

## Supplementary Figure S2.

Experimental position-specific distribution of hnRNP C cross-links on uridine tracts of variable length (adapted by permission from Macmillan Publishers Ltd: Koenig *et al.*, NSMB 2010), compared to the RRM binding models (parametrized with  $K_s[F] = 1/3$ ,  $w = 19.6$ ,  $v = 5.1$  and  $\alpha = 14.2$ ). For the model extended to allow dynamic binding of the 5' RRM, standard deviation  $\sigma$  of the gaussian spread function was optimized by minimizing the model against the data.
